# Supplementary material for: Comparison between Proteome and Transcriptome Response in Potato (Solanum tuberosum L.) Leaves Following Potato Virus Y (PVY) Infection
Source: PubMed Central journal article supplement (PMC5620531; doi:10.3390/proteomes5030014), 2017-07-06

Table S1:

| Peptide ID | Amino acid sequence                        | Probe ID                   | Nucleotide sequence                                                  |
|------------|--------------------------------------------|----------------------------|----------------------------------------------------------------------|
| Peptide 1  | LVIADVAGLAPGTGSLTVFT<br>NEK                | bf_mxflxxx_0013e03.t3m.scf | CTGAGAGCTTATAAGAGTTTACT<br>CATACCAATTGATATATGGGCAG<br>AGAAAAAAGACAAG |
| Peptide 2  | AEGGFLGAEVILK                              |                            |                                                                      |
| Peptide 3  | SLALQGPLAAPVLQYLTK<br>TGYTGEDGFEISVPSENALD |                            |                                                                      |
| Peptide 4  | LAK                                        |                            |                                                                      |
| Peptide 5  | GGAIDDSVVTK                                |                            |                                                                      |
| Peptide 6  | GGDVSWHIHDER                               |                            |                                                                      |
| Peptide 7  | DLAHIEEHMK                                 |                            |                                                                      |
| Peptide 8  | MYFGEFR                                    |                            |                                                                      |
| Peptide 9  | NIAMGYVK                                   |                            |                                                                      |
| Peptide 10 | SYDGVVTK                                   |                            |                                                                      |
| Peptide 11 | DTIPFLEK                                   | MICRO.477.C1               | ACTTTAATCTACATGTTGCTCGTT<br>TTTGCTTATGAGTTCCTTTCAATG<br>CAACATGGACCA |
| Peptide 12 | VGFFSSGPPPR                                |                            |                                                                      |
| Peptide 13 | TVLYDFHVVNGGK                              |                            |                                                                      |
| Peptide 14 | MPFVPTK                                    |                            |                                                                      |
|            |                                            | MICRO.477.C2               | CAGTATAAGGACTCAATTATGGA<br>CTCTACAGTAAATTGTAGGGAGA<br>ATGGTAGTCTCTTT |

Figure S1

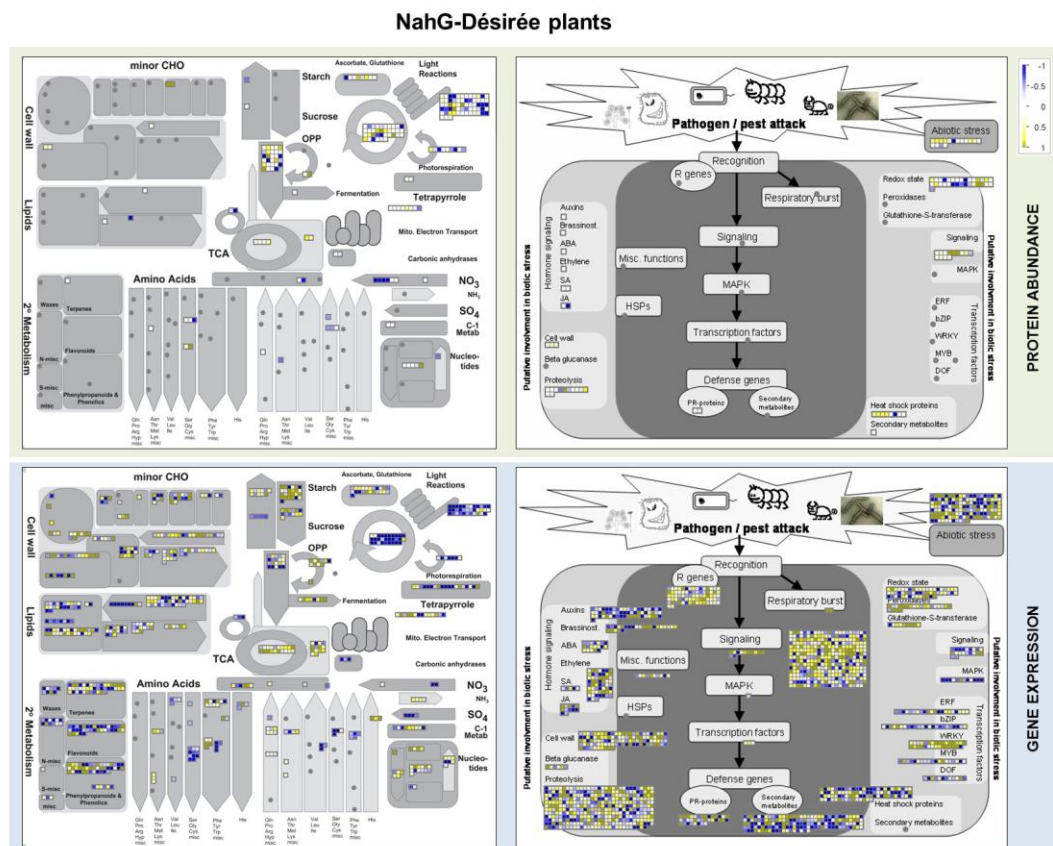

Supplement: proteomes-05-00014-s001.pdf [file proteomes-05-00014-s001.pdf]
